# Supplementary material
Source: publisher figshare collection journal article supplement (https://acs.figshare.com/ndownloader/files/4616893)
Supplement: Supplementary file 1 [file 4616893]

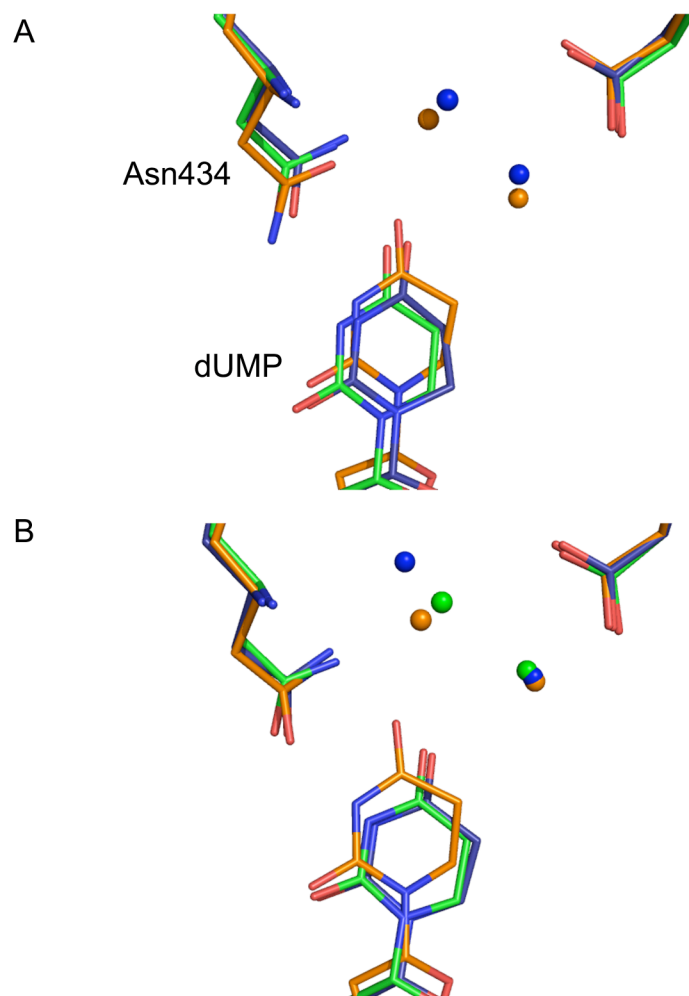

### Supporting Information - Figure S1

A representation of the conserved TS water network from A) Monomer A and B) Monomer B from WT (orange), S290G (green), and A287F (blue) enzymes. Waters are shown as spheres, with the same color scheme as the enzyme structure to which they belong.
